# Supplementary material for: Synthesis and Biological Evaluation of a New Acyclic Pyrimidine Derivative as a Probe for Imaging Herpes Simplex Virus Type 1 Thymidine Kinase Gene Expression
Source: Molecules. 2013 Jul 19;18(7):8535–49. doi: 10.3390/molecules18078535 (PMC6270388; doi:10.3390/molecules18078535)

# Supplementary Materials

**Figure S1.**  $^1\text{H}$ -NMR spectrum of compound **4**.

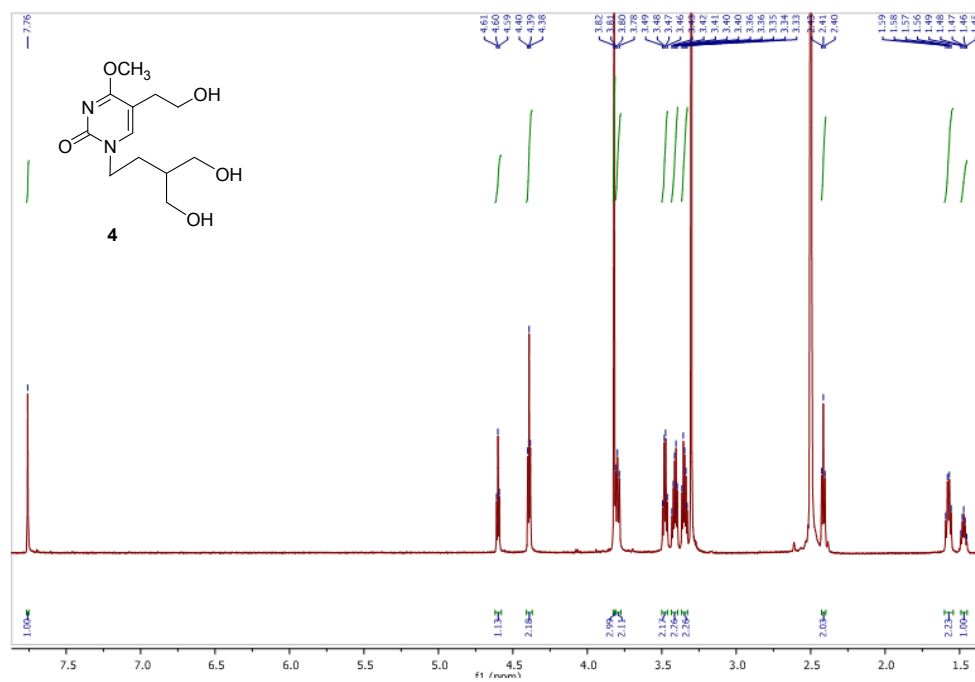

**Figure S2.**  $^{13}\text{C}$ -NMR spectrum of compound **4**.

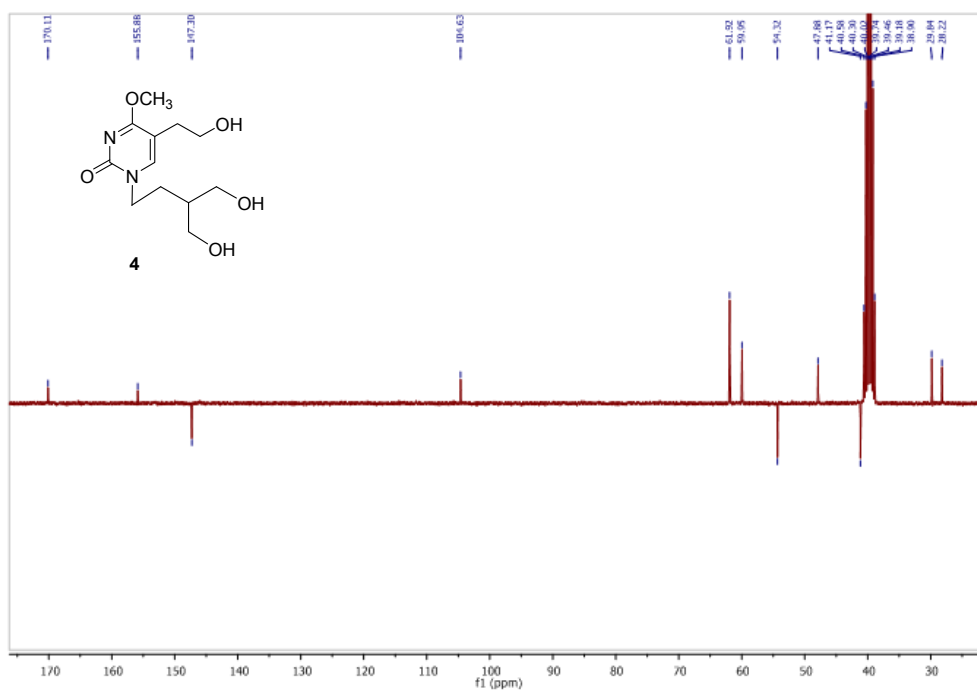

**Figure S3.**  $^1\text{H}$ -NMR spectrum of compound **5**.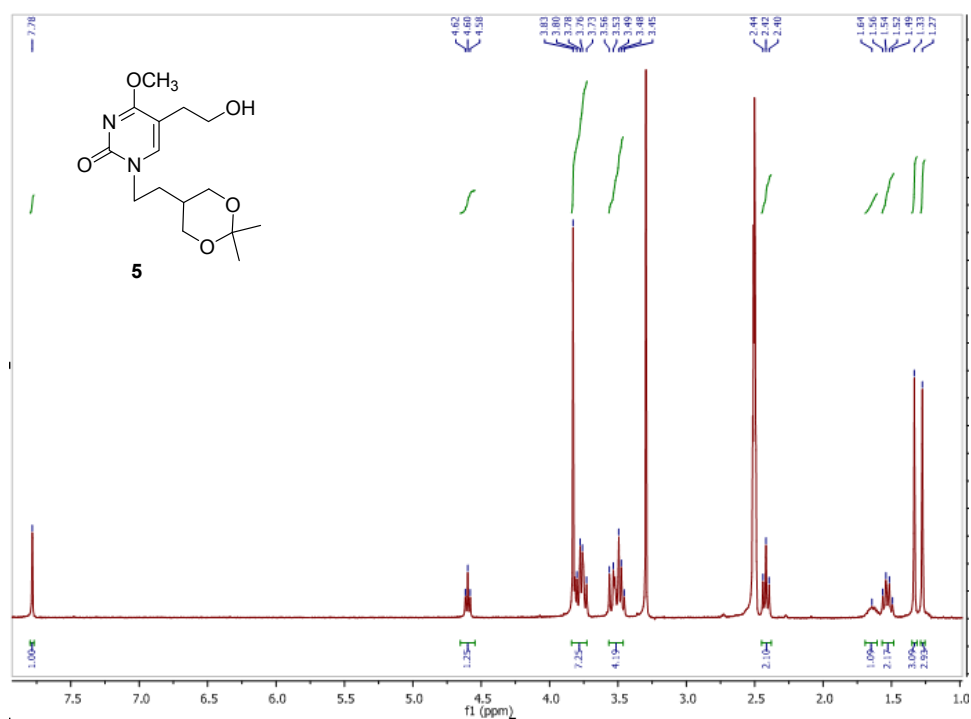**Figure S4.**  $^{13}\text{C}$ -NMR spectrum of compound **5**.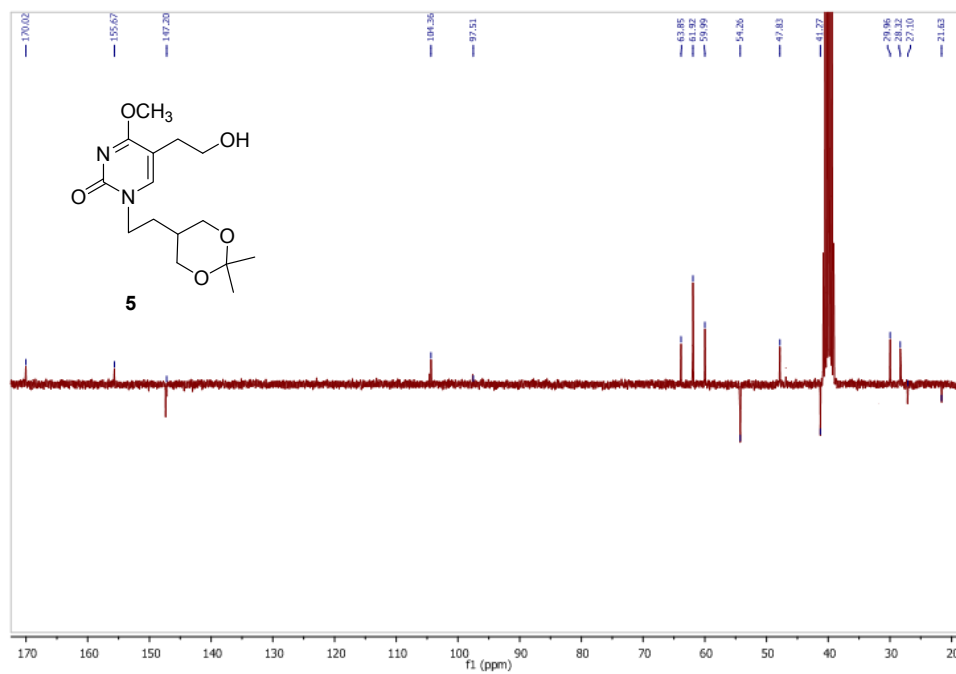

**Figure S5.** (a)  $^1\text{H}$ -NMR spectrum of compound 7. (b) A part of the  $^1\text{H}$ -NMR spectrum of 7 displaying H-F coupling in C-5 side chain of the pyrimidine moiety.

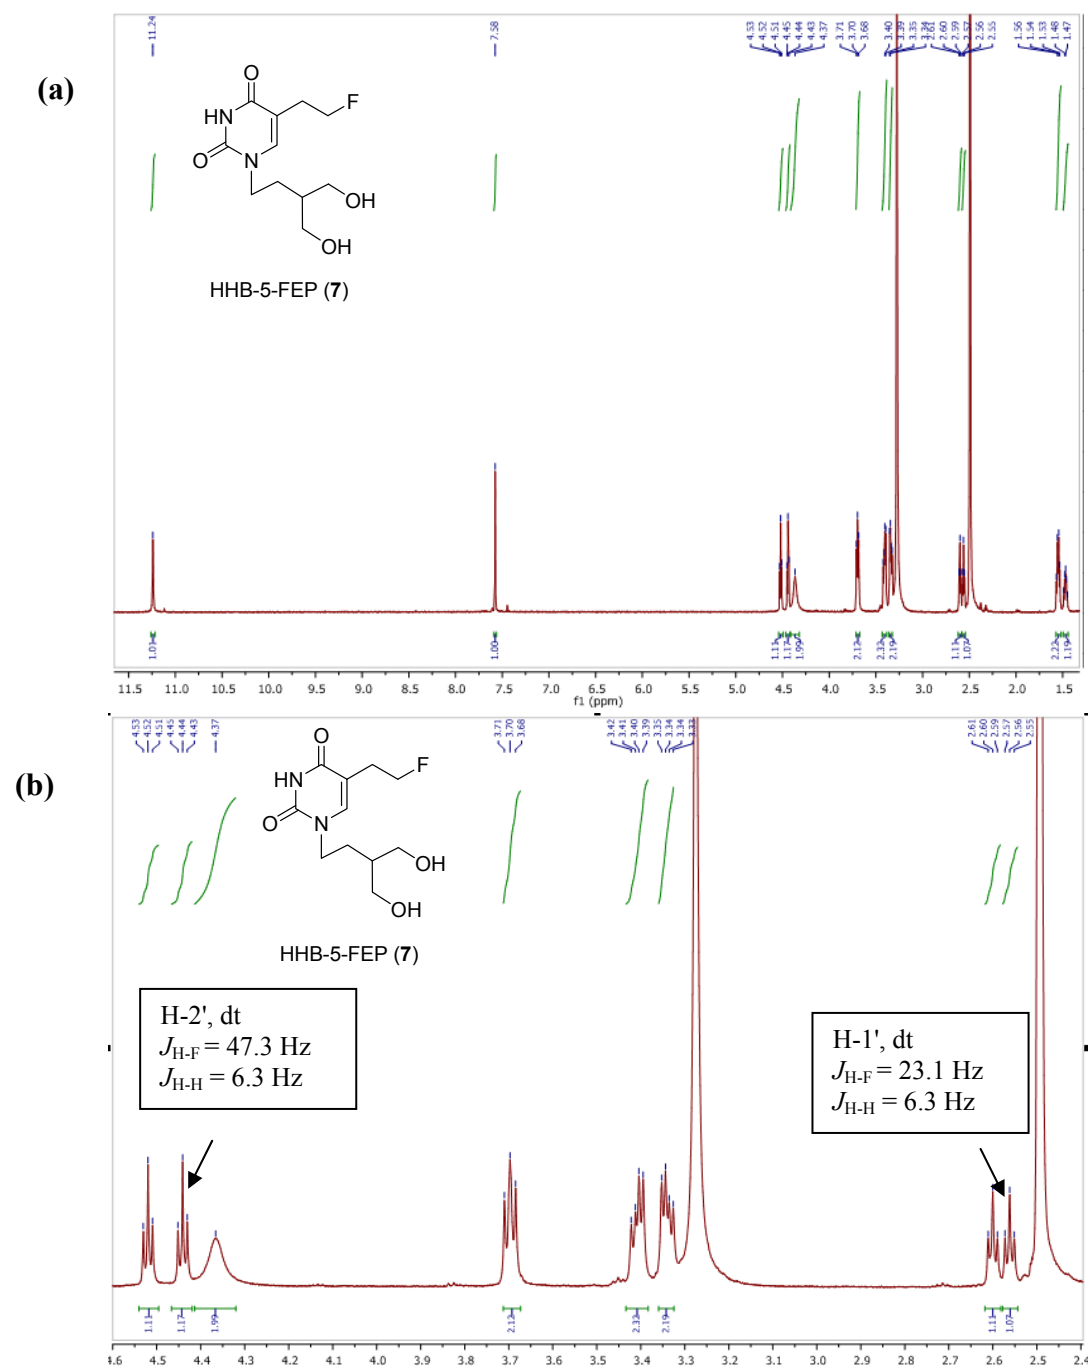

**Figure S6.** A part of the  $^{13}\text{C}$ -NMR spectrum of compound **7** displaying C-F coupling in C-5 side chain of the pyrimidine moiety.

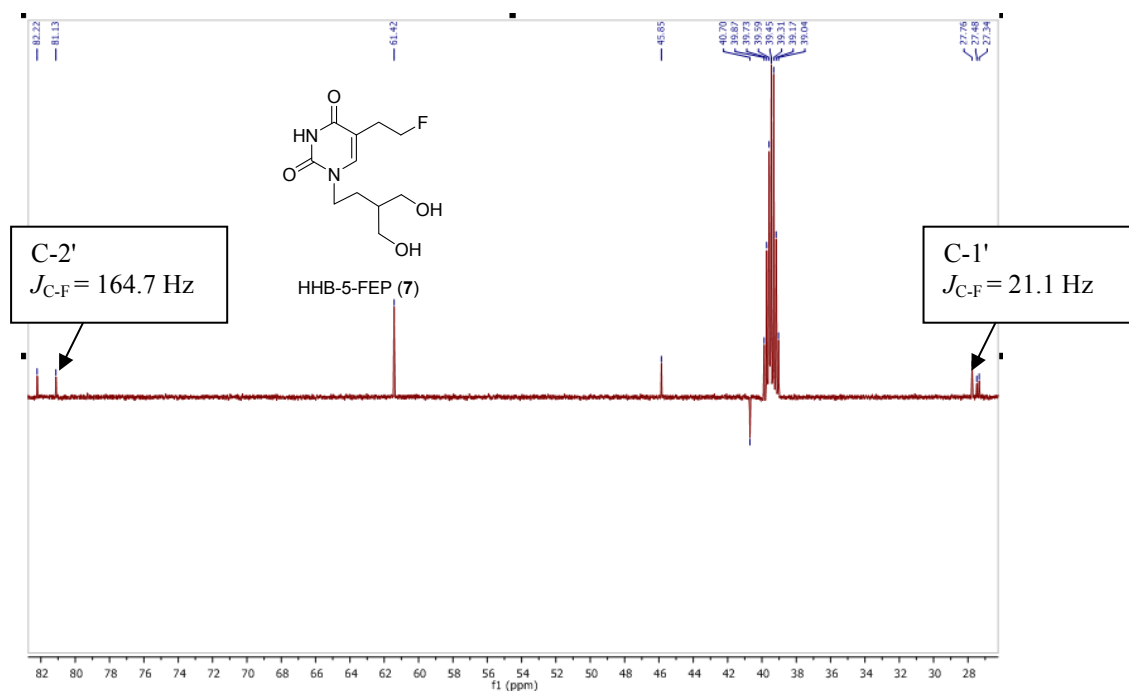

**Figure S7.**  $^1\text{H}$ -NMR spectrum of compound **8**.

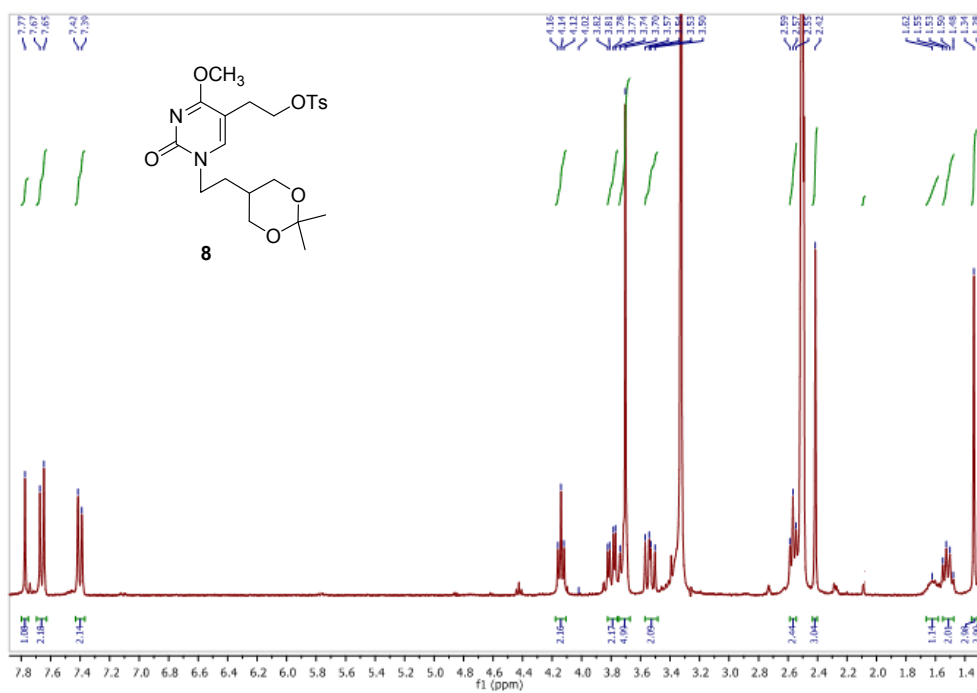

**Figure S8.**  $^{13}\text{C}$ -NMR spectrum of compound **8**.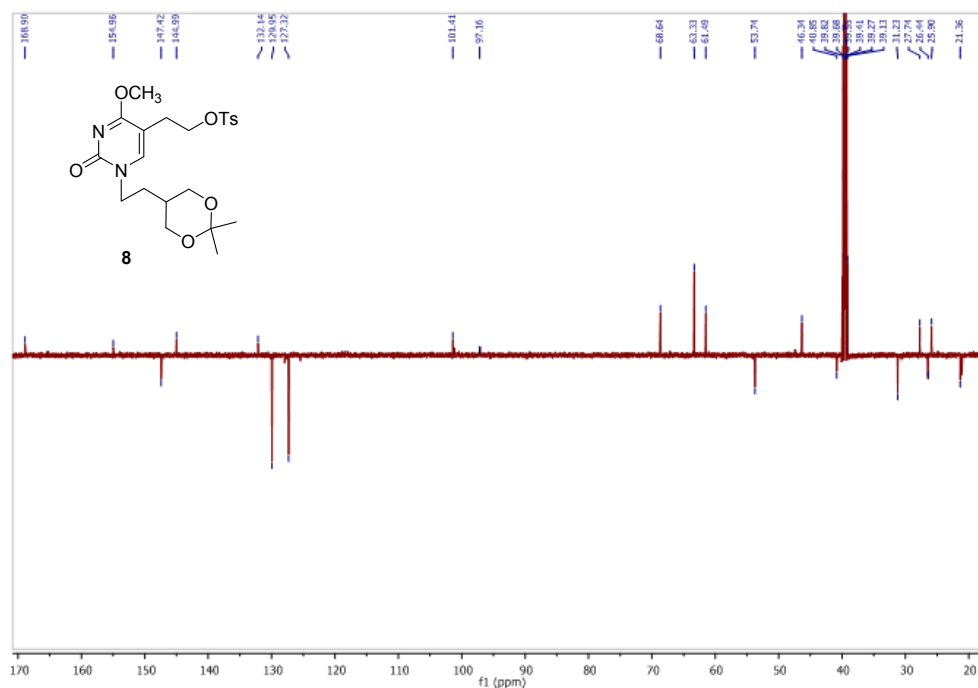**Figure S9.** Analytical HPLC chromatogram of [ $^{18}\text{F}$ ]**7** coinjected with the nonradioactive reference compound **7**.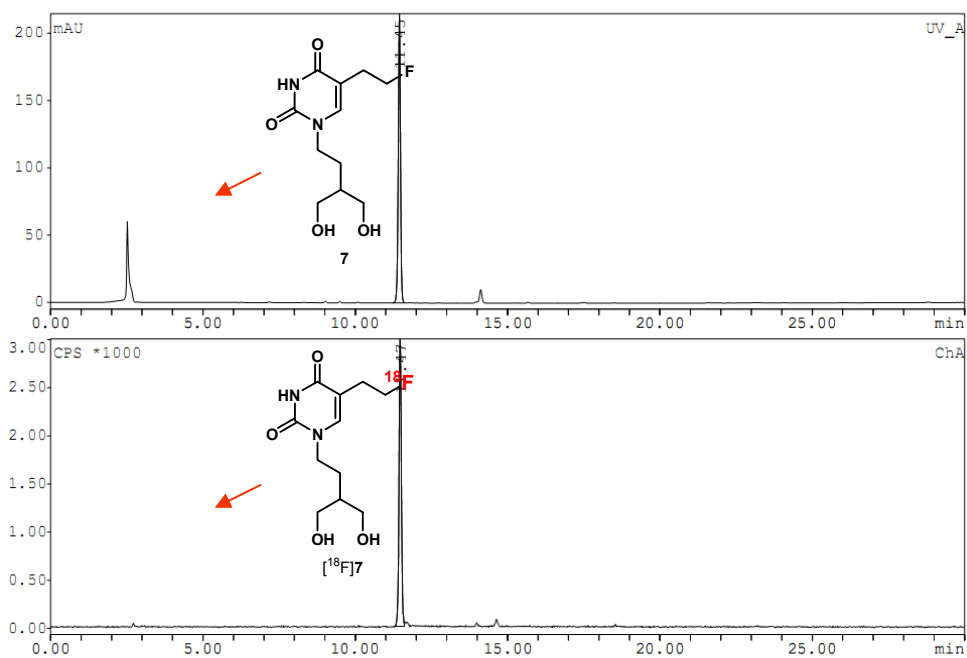

Supplement: Supplementary file 1 [file molecules-18-08535-s001.pdf]
